# Supplementary material for: Starmerella bacillaris Strains Used in Sequential Alcoholic Fermentation with Saccharomyces cerevisiae Improves Protein Stability in White Wines
Source: MDPI journal article supplement (doi:10.3390/fermentation8060252), 2022-05-27
Supplement: s1 [file s1]

**Table S1.** Chemical parameters of the three grape juices before pH and YAN adjustment.

| Grape juice | Glucose (g/L) | Fructose (g/L) | pH   | TA (g/L)  | YAN (mg/L)   |
|-------------|---------------|----------------|------|-----------|--------------|
| <b>SB</b>   | 125.22 ± 1.23 | 105.11 ± 2.04  | 3.22 | 6.5 ± 0.1 | 84.3 ± 2.5   |
| <b>PG</b>   | 109.71 ± 2.17 | 115.26 ± 1.62  | 3.52 | 5.3 ± 0.2 | 39.3 ± 0.6   |
| <b>IM</b>   | 110.37 ± 1.89 | 108.30 ± 1.95  | 3.50 | 5.0 ± 0.2 | 206.7 ± 11.9 |

Values are represented by average and standard deviation (n=3). SB: Sauvignon blanc, PG: Pinot grigio, IM: Incrocio Manzoni. TA: total acidity, YAN: Yeast assimilable nitrogen.

**Table S2.** *Saccharomyces cerevisiae* and *Starmerella bacillaris* concentrations at 48 hours in the three grape juices.

| Strains        | SB                                          | PG                                          | IM                                          |
|----------------|---------------------------------------------|---------------------------------------------|---------------------------------------------|
| <b>EC1118</b>  | 4.62x10 <sup>7</sup> ± 9.45x10 <sup>6</sup> | 3.92x10 <sup>7</sup> ± 6.97x10 <sup>6</sup> | 4.10x10 <sup>7</sup> ± 8.65x10 <sup>6</sup> |
| <b>FRI719</b>  | 6.03x10 <sup>7</sup> ± 9.67x10 <sup>6</sup> | 3.23x10 <sup>7</sup> ± 8.87x10 <sup>6</sup> | 6.75x10 <sup>7</sup> ± 3.99x10 <sup>7</sup> |
| <b>FRI728</b>  | 5.37x10 <sup>7</sup> ± 7.81x10 <sup>6</sup> | 6.22x10 <sup>7</sup> ± 1.09x10 <sup>7</sup> | 5.30x10 <sup>7</sup> ± 1.53x10 <sup>7</sup> |
| <b>FRI729</b>  | 5.85x10 <sup>7</sup> ± 5.79x10 <sup>6</sup> | 7.73x10 <sup>7</sup> ± 6.83x10 <sup>6</sup> | 5.60x10 <sup>7</sup> ± 1.04x10 <sup>7</sup> |
| <b>FRI751</b>  | 6.12x10 <sup>7</sup> ± 8.08x10 <sup>6</sup> | 6.23x10 <sup>7</sup> ± 9.91x10 <sup>6</sup> | 5.93x10 <sup>7</sup> ± 1.31x10 <sup>7</sup> |
| <b>FRI754</b>  | 6.63x10 <sup>7</sup> ± 1.03x10 <sup>7</sup> | 6.23x10 <sup>7</sup> ± 1.16x10 <sup>7</sup> | 6.67x10 <sup>7</sup> ± 1.59x10 <sup>7</sup> |
| <b>FRI7100</b> | 6.23x10 <sup>7</sup> ± 9.09x10 <sup>6</sup> | 3.60x10 <sup>7</sup> ± 8.46x10 <sup>6</sup> | 7.67x10 <sup>7</sup> ± 1.57x10 <sup>7</sup> |
| <b>PAS13</b>   | 4.70x10 <sup>7</sup> ± 7.46x10 <sup>6</sup> | 2.68x10 <sup>7</sup> ± 5.85x10 <sup>6</sup> | 5.72x10 <sup>7</sup> ± 1.49x10 <sup>7</sup> |
| <b>PAS55</b>   | 5.35x10 <sup>7</sup> ± 7.18x10 <sup>6</sup> | 4.55x10 <sup>7</sup> ± 2.75x10 <sup>7</sup> | 4.30x10 <sup>7</sup> ± 8.15x10 <sup>6</sup> |
| <b>PAS66</b>   | 5.35x10 <sup>7</sup> ± 1.01x10 <sup>7</sup> | 4.37x10 <sup>7</sup> ± 1.07x10 <sup>7</sup> | 4.52x10 <sup>7</sup> ± 2.00x10 <sup>7</sup> |
| <b>PAS92</b>   | 4.78x10 <sup>7</sup> ± 1.14x10 <sup>7</sup> | 4.77x10 <sup>7</sup> ± 1.25x10 <sup>7</sup> | 5.33x10 <sup>7</sup> ± 9.88x10 <sup>6</sup> |
| <b>PAS103</b>  | 5.03x10 <sup>7</sup> ± 1.01x10 <sup>7</sup> | 6.28x10 <sup>7</sup> ± 1.68x10 <sup>7</sup> | 2.77x10 <sup>7</sup> ± 1.15x10 <sup>7</sup> |
| <b>PAS151</b>  | 4.15x10 <sup>7</sup> ± 1.07x10 <sup>7</sup> | 6.95x10 <sup>7</sup> ± 3.53x10 <sup>7</sup> | 3.00x10 <sup>7</sup> ± 3.29x10 <sup>6</sup> |
| <b>PAS173</b>  | 5.37x10 <sup>7</sup> ± 1.15x10 <sup>7</sup> | 4.10x10 <sup>7</sup> ± 9.06x10 <sup>6</sup> | 1.34x10 <sup>8</sup> ± 7.98x10 <sup>7</sup> |

Values are represented by average and standard deviation (n=3). SB: Sauvignon blanc, PG: Pinot grigio, IM: Incrocio Manzoni.
